# Supplementary material for: Long-Term Results from the IDEAL-CRT Phase 1/2 Trial of Isotoxically Dose-Escalated Radiation Therapy and Concurrent Chemotherapy for Stage II/III Non-small Cell Lung Cancer
Source: PubMed Central journal article supplement (PMC7049901; doi:10.1016/j.ijrobp.2019.11.397), 2020-03-15
Supplement: mmc1.pdf [file mmc1.pdf]

**Supplementary Table 1. IDEAL-CRT isotoxic dose-prescription.**

|                                             |                                                                                                                                                                                                                                |                                                         |                                                         |                                                                |
|---------------------------------------------|--------------------------------------------------------------------------------------------------------------------------------------------------------------------------------------------------------------------------------|---------------------------------------------------------|---------------------------------------------------------|----------------------------------------------------------------|
| Dose-prescription                           | To ICRU reference-point.                                                                                                                                                                                                       |                                                         |                                                         |                                                                |
| Target coverage                             | $\geq 98\%$ of PTV covered by $\geq 90\%$ prescribed dose.                                                                                                                                                                     |                                                         |                                                         |                                                                |
| Initial dose-prescription based on lung-GTV | Prescribed tumor dose initially chosen so that lung-GTV EQD2 <sub>mean</sub> was 18.2 Gy, then reduced by 10% to allow for possible intensification of radiation effect by concurrent chemotherapy.                            |                                                         |                                                         |                                                                |
| Maximum tumor prescribed dose               | 73 and 71 Gy for the 6- and 5-week schedules. Higher initial prescribed doses were reduced to these levels.                                                                                                                    |                                                         |                                                         |                                                                |
| Minimum tumor prescribed dose               | 63 Gy. Lower initial prescribed doses were raised to this level provided the resulting lung-GTV EQD2 <sub>mean</sub> was $\leq 19.3$ Gy and $V_{20}^{\dagger} \leq 35\%$ . Otherwise the patient was ineligible for IDEAL-CRT. |                                                         |                                                         |                                                                |
| Other normal tissue dose-constraints        | Tumor prescribed doses were reduced further if necessary to meet the normal tissue dose-limits below. A resulting prescribed dose $< 63$ Gy made a patient ineligible for IDEAL-CRT.                                           |                                                         |                                                         |                                                                |
| Spinal Cord                                 | $D_{0.1cc}^* \leq 47\text{Gy}$                                                                                                                                                                                                 |                                                         |                                                         |                                                                |
| Brachial plexus                             | $D_{30\%} \leq 60\text{Gy}$ , $D_{0.1cc} \leq 65\text{Gy}$                                                                                                                                                                     |                                                         |                                                         |                                                                |
| Heart                                       | $D_{100\%} < 45$ Gy, $D_{67\%} < 53$ Gy, $D_{33\%} < 60$ Gy (6-week schedule)<br>$D_{100\%} < 44$ Gy, $D_{67\%} < 52$ Gy, $D_{33\%} < 59$ Gy (5-week schedule)                                                                 |                                                         |                                                         |                                                                |
| Esophagus                                   | Dose to 1 cc<br>= 65 Gy<br>for Group 1<br>(6- & 5-week)                                                                                                                                                                        | Dose to 1 cc<br>= 68 Gy<br>for Group 1<br>(6-week only) | Dose to 1 cc<br>= 71 Gy<br>for Group 1<br>(6-week only) | Dose to 1 cc<br>$\leq 63$ Gy**<br>for Group 2<br>(6- & 5-week) |

<sup>†</sup>  $V_X$  denotes the percentage of a structure receiving more than X Gy.

\*  $D_{X[cc \text{ or } \%]}$  denotes the minimum dose delivered to the most highly irradiated X cc or X% of the tissue.

\*\* For the 6 week schedule this dose-level was increased to 65 Gy, and then 68 Gy as safety data became available from Group 1.

**Supplementary Table 2. Grade  $\geq 3$  adverse events, and grade  $\geq 3$  adverse events at least possibly radiotherapy-related, listed for events with rates  $\geq 5\%$ .**

|                                                                 | <b>6-week schedule<br/>(N=82)</b> | <b>5-week schedule<br/>(N=36)</b> | <b>Total<br/>(N=118)</b> |
|-----------------------------------------------------------------|-----------------------------------|-----------------------------------|--------------------------|
| <b>Any adverse event</b>                                        |                                   |                                   |                          |
| Lung infection                                                  | 20 (24.4%)                        | 5 (13.9%)                         | 25 (21.2%)               |
| Decreased FEV                                                   | 14 (17.1%)                        | 2 (5.6%)                          | 16 (13.6%)               |
| Decreased neutrophils                                           | 12 (14.6%)                        | 0 (0.0%)                          | 12 (10.2%)               |
| Decreased WBC                                                   | 11 (13.4%)                        | 1 (2.8%)                          | 12 (10.2%)               |
| Dyspnoea                                                        | 12 (14.6%)                        | 0 (0.0%)                          | 12 (10.2%)               |
| Decreased lymphocytes                                           | 9 (11.0%)                         | 2 (5.6%)                          | 11 (9.3%)                |
| Pulmonary embolism                                              | 7 (8.5%)                          | 2 (5.6%)                          | 9 (7.6%)                 |
| Decreased CO diffusing capacity                                 | 6 (7.3%)                          | 2 (5.6%)                          | 8 (6.8%)                 |
| Fatigue                                                         | 7 (8.5%)                          | 0 (0.0%)                          | 7 (5.9%)                 |
| Late radiation fibrosis                                         | 6 (7.3%)                          | 1 (2.8%)                          | 7 (5.9%)                 |
| Esophagitis                                                     | 5 (6.1%)                          | 2 (5.6%)                          | 7 (5.9%)                 |
| Nausea                                                          | 5 (6.1%)                          | 1 (2.8%)                          | 6 (5.1%)                 |
| <b>Any adverse event at least possibly radiotherapy-related</b> |                                   |                                   |                          |
| Decreased FEV                                                   | 12 (14.6%)                        | 2 (5.6%)                          | 14 (11.9%)               |
| Lung infection                                                  | 8 (9.8%)                          | 2 (5.6%)                          | 10 (8.5%)                |
| Decreased neutrophils                                           | 7 (8.5%)                          | 0 (0.0%)                          | 7 (5.9%)                 |
| Decreased CO diffusing capacity                                 | 6 (7.3%)                          | 1 (2.8%)                          | 7 (5.9%)                 |
| Decreased WBC                                                   | 7 (8.5%)                          | 0 (0.0%)                          | 7 (5.9%)                 |
| Late radiation fibrosis                                         | 6 (7.3%)                          | 1 (2.8%)                          | 7 (5.9%)                 |
| Esophagitis                                                     | 5 (6.1%)                          | 2 (5.6%)                          | 7 (5.9%)                 |
